# Supplementary material for: RNA-Sequencing Analysis of 5' Capped RNAs Identifies Many New Differentially Expressed Genes in Acute Hepatitis C Virus Infection
Source: PubMed Central journal article supplement (PMC3347324; doi:10.3390/v4040581), 2012-04-16

**Figure S1.** Differential expression of c-myc in HCV infected Huh7.5 cells as compared to mock-infected cells. **(A)** Gene expression is displayed by number of reads per kilobase of gene length per million reads (RPKM) using the Integrated Genome Browser (IGB). The y-axis represents RPKM, and x-axis represents chromosome location and gene structure (Methods). RNA sequencing reads from a pool of three replicates in HCV infected cells at 6, 48 and 72h are shown in red, and in mock-infected cells in blue. Gene structure, orientation and chromosomal location are shown in black. **(B)** Quantitative PCR was used to investigate (and check the RNA-seq data) the effect of JFH-1 infection on Huh7.5 cell gene expression. Six mock infected and six HCV infected hepatocyte culture specimens were used for qPCR at each time point. The qRT-PCR data shown represent the means  $\pm$  standard error (SEM) for triplicate samples and the location of qPCR primers is indicated on the IGB plot (left side). *p*-values were calculated using the Student's *t*-test, and *p* values  $<0.05$  were considered significant.

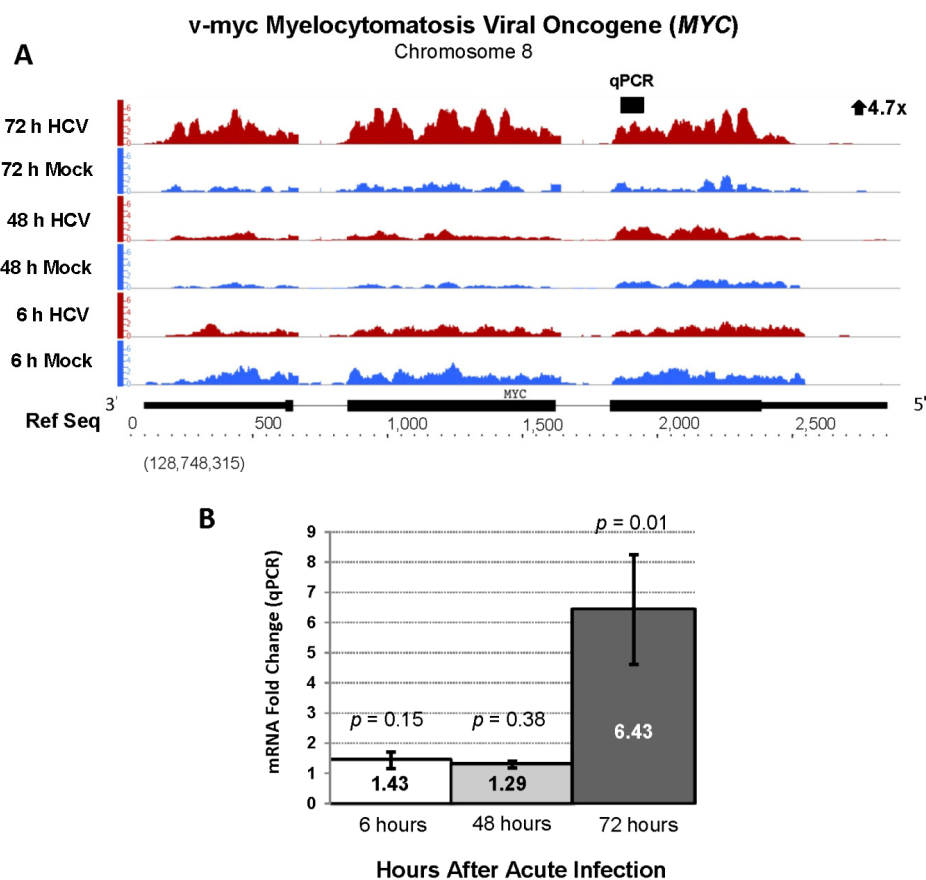

**Figure S2.** Differential expression of ANKRD1 in HCV infected Huh7.5 cells as compared to mock-infected cells. Our RNA-seq data identified a fold change of 12.1 and FDR value of 351.2 (Panel A, sequencing reads displayed in IGB) and qPCR assays indicated a fold change of 4.7 (Panel B, qPCR results). The RNA sequencing and qPCR data are presented as in Supplemental Figure 1.

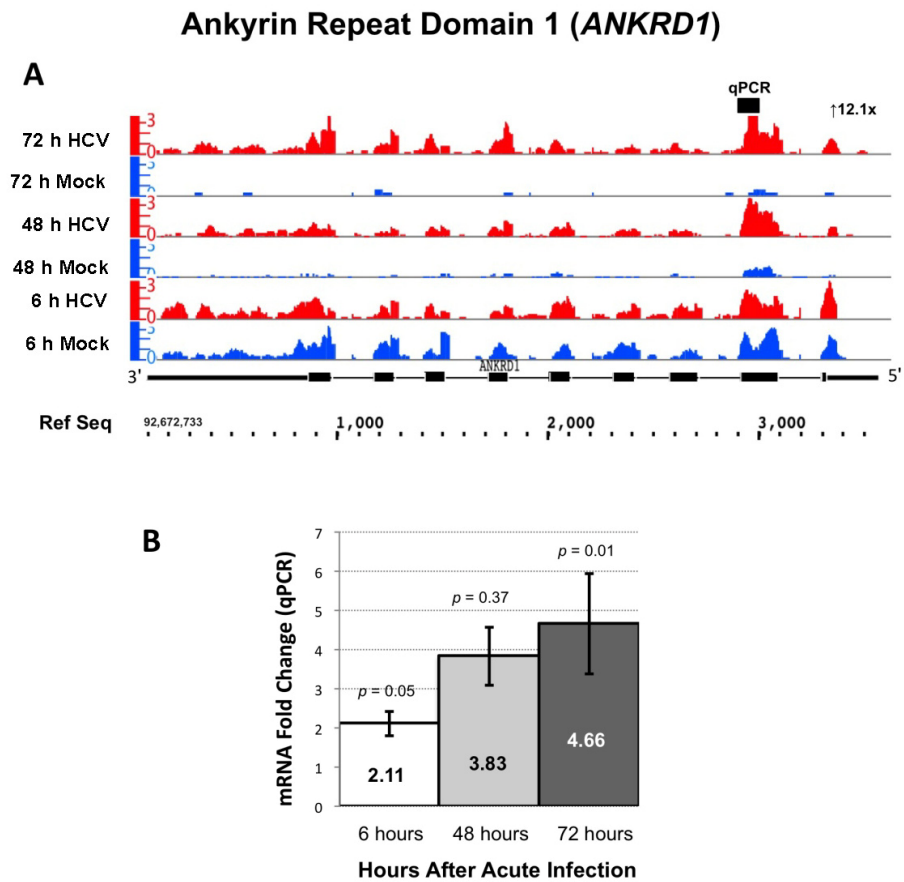

**Figure S3.** Differential expression of Filamin C in HCV infected Huh7.5 cells as compared to mock-infected cells. Our RNA-seq data identified a fold change of 13.4 and FDR value of 1160.2 (Panel A, sequencing reads displayed in IGB) and qPCR assays indicated a fold change of 5.2 (Panel B, qPCR results). The RNA sequencing and qPCR data are presented as in Supplemental Figure 1.

### Filamin C, gamma (*FLNC*)

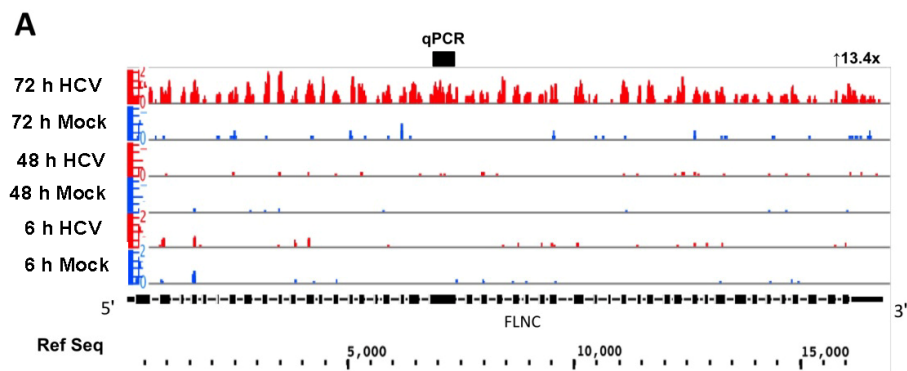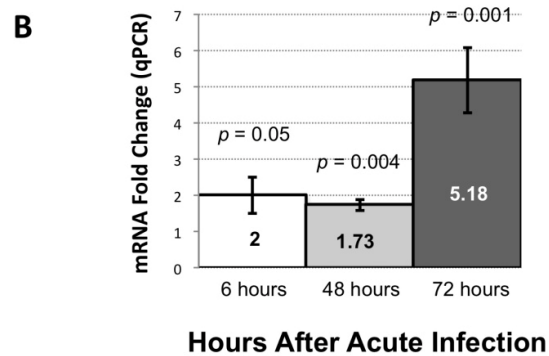

**Figure S4.** Differential expression of IRS-2 in HCV infected Huh7.5 cells as compared to mock-infected cells. Our RNA-seq data identified a fold change of 2.86 and FDR value of 133.9 (Panel A, sequencing reads displayed in IGB) and qPCR assays indicated a fold change of 3.8 (Panel B, qPCR results). The RNA sequencing and qPCR data are presented as in Supplemental Figure 1.

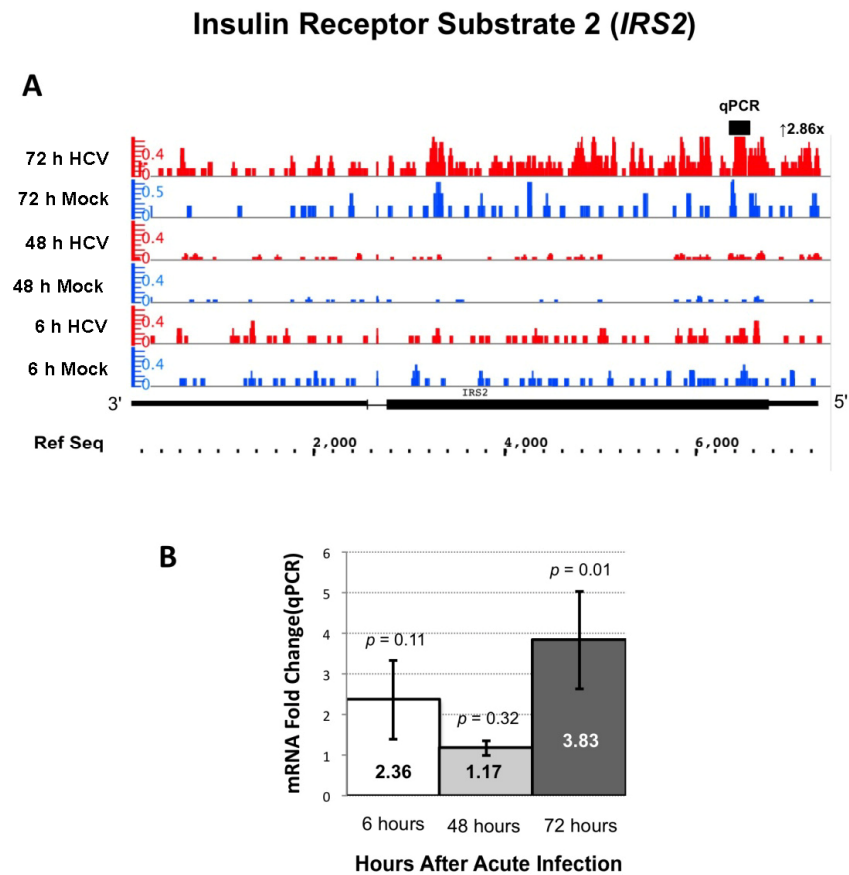

**Figure S5. (A)** Verification of *FUT1* and *KLHDC7B* siRNA gene expression knock-down Huh 7.5 cell cultures (triplicate for each condition and time in six well plates) by qPCR analysis (see Experimental Procedures). The control (open bar) represents cells transfected with a scrambled control siRNA. The data are presented as mean  $\pm$ SEM. **(B)** Cytotoxicity assays were done under conditions that mimicked the siRNA studies. Huh 7.5 cells were plated in 96-well plate, cultured for 24 hours and transfected with siRNA against *FUT1*, *KLHDC7B* or control siRNA. Cells were mock infected 24 hours after transfection. Cell supernatants were collected (72 hours after transfection) and assayed for cellular toxicity using a lactate dehydrogenase cytotoxicity assay kit, CytoTox-ONE (Promega, Madison, WI, USA) according to manufacturer's recommendations (Experimental Procedures).

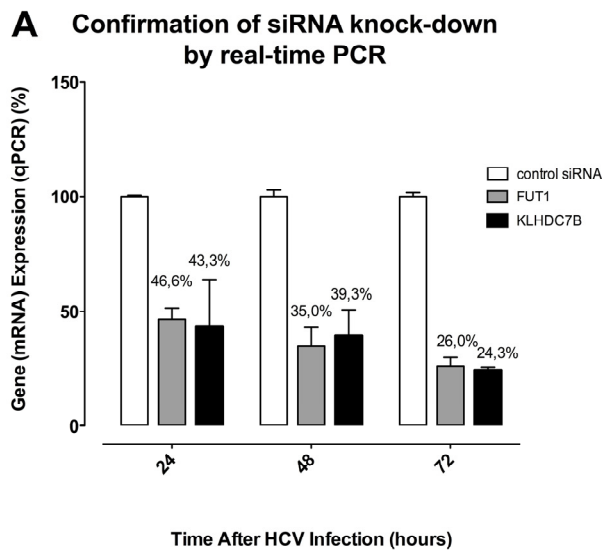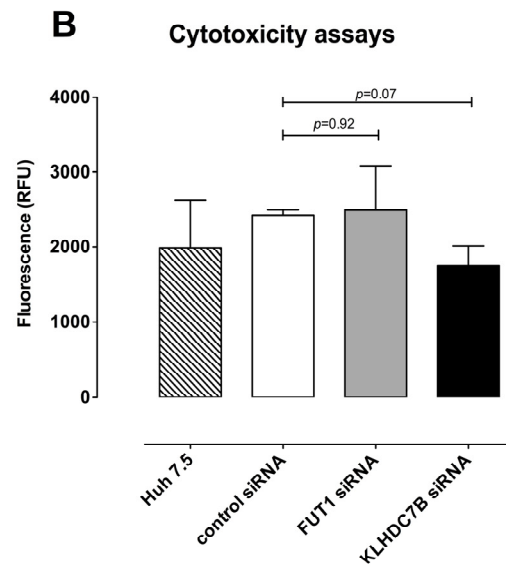

Supplement: viruses-04-00581-s001.pdf [file viruses-04-00581-s001.pdf]
